# Supplementary material
Source: publisher figshare collection journal article supplement (https://acs.figshare.com/ndownloader/files/19202876)
Supplement: Supplementary file 1 [file 19202876]

Compound	SMILES
1	O=C(CCCCCCCCCCCCCCC[P+](C1=CC=CC=C1)(C2=CC=CC=C2)C3=CC=CC=C3)C4=CC=C(O)C=C4O.[Br-]
2	O=C(CCCCCCCCCCCCCCC[P+](C1=CC=CC=C1)(C2=CC=CC=C2)C3=CC=CC=C3)C4=CC=C(O)C=C4C.[Br-]
3	O=C(C1=C(C)C=C(O)C=C1)CCCCCCCCCCCCCCC[P+](C2=CC=CC=C2)(C3=NC=CC=C3)C4=CC=CC=C4.[Br-]
4	O=C(CCCCCCCCCCCCCCC[P+](C1=CC=CC2=C1C=CC=C2)(C3=C(C=CC=C4)C4=CC=C3)C5=CC=CC6=C5C=CC=C6)C7=CC=C(O)C=C7O.[Br-]
9	OCCCCCCCCCCCCCC[P+](C1=CC=CC=C1)(C2=CC=CC=C2)C3=CC=CC=C3.[Br-]
10	O=C(OCCCCCCCCCCCC[N+]1=CC=CC2=CC=CC=C21)C3=CC=C(O)C=C3O.[Br-]
11	O=C(OCCCCCCCCCCCCCC[N+]1=CC=CC2=CC=CC=C21)C3=CC=C(O)C=C3O.[Br-]
12	O=C(OCCCCCCCCCCCCCCCC[N+]1=CC=CC2=CC=CC=C21)C3=CC=C(O)C=C3O.[Br-]
13	O=C(OCCCCCCCCCCCCCC[N+]1=CC=CC2=CC=CC=C21)C3=CC=C(O)C=C3C.[Br-]
14	O=C(OCCCCCCCCCCCCCC[N+]1=CC=CC2=CC=CC=C21)C3=C(O)C=C(O)C=C3C.[Br-]
15	O=C(OCCCCCCCCCCCC[P+](C1=CC=CC=C1)(C2=CC=CC=C2)C3=CC=CC=C3)C4=CC=C(O)C=C4O.[Br-]
16	O=C(OCCCCCCCCCCCCCC[P+](C1=CC=CC=C1)(C2=CC=CC=C2)C3=CC=CC=C3)C4=CC=C(O)C=C4O.[Br-]
17	O=C(OCCCCCCCCCCCCCC[P+](C1=CC=CC=C1)(C2=CC=CC=C2)C3=CC=CC=C3)C4=CC=C(O)C=C4C.[Br-]
18	O=C(C1=C(C)C=C(O)C=C1)OCCCCCCCCCCCCCC[P+](C2=CC=CC=N2)(C3=CC=CC=C3)C4=CC=CC=C4.[Br-]
19	O=C(OCCCCCCCCCCCCCC[P+](C1=CC=CC=C1)(C2=CC=CC=C2)C3=CC=CC=C3)C4=C(O)C=C(O)C=C4C.[Br-]
20	O=C(OC)C1=CC=C(OCCCCCCCCCCCCCC[N+]2=CC=CC3=C2C=CC=C3)C=C1C.[Br-]
21	O=C(OC)C1=CC=C(OCCCCCCCCCCCCCC[N+]2=CC=CC3=C2C=CC=C3)C=C1F.[Br-]
22	O=C(OCC)C1=C(C)C=C(OCCCCCCCCCCCCCC[N+]2=CC=CC3=C2C=CC=C3)C=C1O.[Br-]
23	O=C(C1=CC=C(C=C1C)OCCCCCCCCCCCCCC[P+](C2=CC=CC=C2)(C3=CC=CC=C3)C4=CC=CC=C4)OC.[Br-]
24	O=C(OCC)C1=C(C)C=C(OCCCCCCCCCCCCCC[P+](C2=CC=CC=C2)(C3=CC=CC=C3)C4=CC=CC=C4)C=C1O.[Br-]
25	O=C(OC)C1=CC=C(OCCCCCCCCCCCCCC[P+](C2=CC=CC=C2)(C3=CC=CC=C3)C4=CC=CC=C4)C=C1F.[Br-]
26	O=C(OC)C1=CC=C(OCCCCCCCCCC[P+](C2=CC=CC=C2)(C3=CC=CC=C3)C4=CC=CC=C4)C=C1O.[Br-]
27	O=C(O)C1=C(C)C=C(OCCCCCCCCCCCCCC[P+](C2=CC=CC=C2)(C3=CC=CC=C3)C4=CC=CC=C4)C=C1O.[Br-]
28	O=C(O)C1=CC=C(OCCCCCCCCCCCCCC[P+](C2=CC=CC=C2)(C3=CC=CC=C3)C4=CC=CC=C4)C=C1F.[Br-]
29	O=C(O)C1=CC=C(OCCCCCCCCCCCCCC[P+](C2=CC=CC=C2)(C3=CC=CC=C3)C4=CC=CC=C4)C=C1O.[Br-]
30	O=C(O)C1=CC=C(OCCCCCCCCCC[P+](C2=CC=CC=C2)(C3=CC=CC=C3)C4=CC=CC=C4)C=C1O.[Br-]
31	O=C([H])C1=CC=C(OCCCCCCCCCCCCCC[P+](C2=CC=CC=C2)(C3=CC=CC=C3)C4=CC=CC=C4)C=C1O.[Br-]
32	O=C([H])C1=CC=C(OCCCCCCCCCCCCCC[N+]2=CC=CC3=C2C=CC=C3)C=C1O.[Br-]
33	O=C(OC)C1=CC=C(OC/C(C)=C/CC/C(C)=C/COC(C)=O)C=C1C
34	O=C(OC)C1=CC=C(OC/C(C)=C/CC/C(C)=C/COC(C)=O)C=C1O
35	O=C(OC)C1=CC=C(OC/C(C)=C/CC/C(C)=C/COC(C)=O)C=C1F
36	O=C(OCC)C1=C(C)C=C(OC/C(C)=C/CC/C(C)=C/CO)C=C1O
37	O=C(OCC)C1=C(O)C=C(OC/C(C)=C/CC/C(C)=C/CC/C(C)=C/COC(C)=O)C=C1C
38	O=C(O)C1=C(O)C=C(OC/C(C)=C/CC/C(C)=C/CC/C(C)=C/CO)C=C1C
39	OC(C1=CC=C(OC/C(C)=C/CC/C(C)=C/CO)C=C1F)=O
40	OC(C1=C(C)C=C(OC/C(C)=C/CC/C(C)=C/CO)C=C1O)=O
Amphotericin B	O=C(O[C@@H](C)[C@H](C)[C@H](C)[C@@H](C)/C=C/C=C/C=C/C=C/C=C/CC/C=C/1)C[C@H](O)C[C@H](O)CC[C@@H](O)[C@H](O)C[C@H](O)C[C@@]2(O)O[C@@]([C@H](C(O)=O)[C@@H](O)C2)([H])C[C@H]1O[C@H](O[C@H](C)[C@H]3O)[C@@H](O)[C@H]3N
